# Supplementary material for: Infectious human adenoviruses are shed in urine even after disappearance of urethral symptoms
Source: PLoS One. 2019 Mar 6;14(3):e0212434. doi: 10.1371/journal.pone.0212434 (PMC6402629; doi:10.1371/journal.pone.0212434)
Supplement: S2 Table — (XLSX) [file pone.0212434.s002.xlsx]

## Sheet: Supporting_Table2
		S2 Table. Summary of all urethritis types, including NCNGU and HAdV types.
				All urethritis cases		NCNGU				Adenovirus cases
								All					HAdV-D37				HAdV-D56				HAdV-D64				HAdV-B11
		Coinfection								No	Yes			No	Yes			No	Yes			No	Yes			No	Yes
		Number of cases		398		165		32		23	9		9	5	4		14	12	2		8	6	2		1	0	1
		Age
		Average		34		35		36		37	35		40	41	39		36	37	30		34	33	38		21	-	21
		Median		32		34		37		38	30		39	39	40		34	35	30		30	30	38		21	-	21
		Viral copies / mL urine
		Average		-		-		1 × 109		2 × 109	2 × 107		4 × 107	5 × 107	3 × 107		5 × 108	6 × 108	4 × 106		4 × 109	5 × 109	2 × 107		1 × 105	-	1 × 105
		Median		-		-		1 × 107		1 × 107	8 × 106		2 × 107	5 × 106	3 × 107		3 × 107	5 × 107	4 × 106		1 × 107	1 × 107	2 × 107		1 × 105	-	1 × 105
		Incubation time
		Average		-		-		10		9.7	9.5		9	10	8		9	9	10		10	10	10		14		14
		Median		-		-		10		9.5	10.5		10	11	10		9	9	10		10	10	10		14		14
		Days of illness
		Average		-		-		5		6	3.6		6	8	3		5	5	5		5	6	3		5		5
		Median		-		-		4		4	4		3	3	3		4	4	5		5	5	3		5		5
		Other symptoms
		Pharyngitis		-		-		5/32		4/23	1/9		1/9	1/5	0		3/14	2/12	1/2		1/8	1/6	0		0		0
		Conjunctivitis		-		-		13/32		12/23a	1/9a		4/9	4/5	0		6/14	5/12	1/2		3/8	3/6	0		0		0
		a P<0.05
